# Supplementary material
Source: Royal Society of Chemistry journal article supplement (doi:10.1039/d6fo00371k)
Supplement: d6fo00371k1.pdf [file d6fo00371k1.pdf]

## Supplementary Data

**Table S1:** Impact of animal-derived food groups on gut bacteria and associated health effects

| Group              | Food                | Effect         | Bacteria                | Health                                                                                                                                                       | References                                                                               |                                               |
|--------------------|---------------------|----------------|-------------------------|--------------------------------------------------------------------------------------------------------------------------------------------------------------|------------------------------------------------------------------------------------------|-----------------------------------------------|
| Meat               | White meat          | +              | <i>Holdemanella</i>     | Data not available                                                                                                                                           | (Lin et al. 2021)<br>(Lang et al. 2018)                                                  |                                               |
|                    |                     | +              | <i>Bacteroides</i>      |                                                                                                                                                              |                                                                                          |                                               |
|                    | Red meat            |                | -                       | <i>Weissella</i>                                                                                                                                             | Data not available                                                                       | (Zhang et al. 2022)<br>(Lin et al. 2021)      |
|                    |                     |                | +                       | <i>Escherichia</i>                                                                                                                                           |                                                                                          |                                               |
|                    |                     |                | +                       | <i>Coprobacillus</i>                                                                                                                                         |                                                                                          |                                               |
|                    |                     |                | +                       | <i>Shigella</i>                                                                                                                                              |                                                                                          |                                               |
|                    |                     |                | +                       | <i>Peptoniphilus</i>                                                                                                                                         |                                                                                          |                                               |
|                    |                     |                | +                       | <i>Bacteroides</i>                                                                                                                                           | Inflammation lower anti-inflammatory responses<br>increased incidence of type 2 diabetes | (Larsen et al. 2010;<br>Karlsson et al. 2013) |
|                    |                     |                | +                       | <i>Fusobacterium</i>                                                                                                                                         |                                                                                          |                                               |
|                    |                     |                | -                       | <i>Lactobacillus</i>                                                                                                                                         |                                                                                          |                                               |
|                    |                     |                | -                       | <i>Roseburia</i>                                                                                                                                             |                                                                                          |                                               |
|                    |                     |                | +                       | <i>Prevotella</i>                                                                                                                                            | CVD risk                                                                                 | (Koeth et al. 2013)                           |
|                    |                     |                | +                       | <i>Clostridium</i>                                                                                                                                           | CRC with increase of $\beta$ -glucuronidase activity                                     | (Lee et al. 2022)                             |
|                    |                     |                | +                       | Fusobacteria                                                                                                                                                 | CRC                                                                                      | (Shen et al. 2021)                            |
|                    |                     |                | +                       | Proteobacteria                                                                                                                                               |                                                                                          |                                               |
|                    |                     |                | -                       | Firmicutes                                                                                                                                                   |                                                                                          |                                               |
|                    | -                   | Prevotellaceae |                         |                                                                                                                                                              |                                                                                          |                                               |
|                    | Meat diet           |                | +                       | <i>Dorea</i>                                                                                                                                                 | Data not available                                                                       | (Hess et al. 2018)                            |
|                    |                     |                | +                       | Clostridia                                                                                                                                                   |                                                                                          |                                               |
|                    | Chicken-based diet  |                | -                       | <i>Bacteroides</i>                                                                                                                                           | Immunoglobulin downregulation in feces                                                   | (Zhao et al. 2022)                            |
|                    |                     |                | -                       | Firmicutes                                                                                                                                                   |                                                                                          |                                               |
|                    |                     |                | +                       | Proteobacteria                                                                                                                                               | Data not available                                                                       |                                               |
|                    | The beef-based diet |                | +                       | Lachnospiraceae                                                                                                                                              | Data not available                                                                       |                                               |
|                    |                     |                | +                       | <i>Ruminococcus</i>                                                                                                                                          |                                                                                          |                                               |
|                    | Whey-beef protein   |                | 0                       | <i>Roseburia</i>                                                                                                                                             | Data not available                                                                       | (Moreno-Pérez et al. 2018)                    |
|                    |                     |                | -                       | <i>Bifidobacterium longum</i>                                                                                                                                |                                                                                          |                                               |
|                    |                     |                | -                       | <i>Blautia</i>                                                                                                                                               |                                                                                          |                                               |
| +                  |                     |                | Bacteroidota            |                                                                                                                                                              |                                                                                          |                                               |
| Higher meat intake |                     | -              | <i>Anaerostipes</i>     | Data not available                                                                                                                                           | (Wang et al. 2023)                                                                       |                                               |
|                    |                     | -              | <i>Faecalibacterium</i> |                                                                                                                                                              |                                                                                          |                                               |
|                    |                     | +              | <i>Roseburia</i>        |                                                                                                                                                              |                                                                                          |                                               |
| Fried meat         |                     | -              | Lachnospiraceae         | Changes in IGI and MIRI values and LPS, fibroblast growth factor 21(FGF21), and serum inflammatory factors (TNF- $\alpha$ , IL-1 $\beta$ , and IL-10) levels | (Gao et al. 2021)                                                                        |                                               |
|                    |                     | -              | <i>Flavonifractor</i>   |                                                                                                                                                              |                                                                                          |                                               |
|                    |                     | +              | <i>Dialister</i>        |                                                                                                                                                              |                                                                                          |                                               |
|                    |                     | +              | <i>Dorea</i>            |                                                                                                                                                              |                                                                                          |                                               |
|                    |                     | +              | <i>Veillonella</i>      |                                                                                                                                                              |                                                                                          |                                               |
| Pork meat          |                     | +              | <i>Bacteroides</i>      | Data not available                                                                                                                                           | (Shi et al. 2021)                                                                        |                                               |
|                    |                     | +              | <i>Dialister</i>        |                                                                                                                                                              |                                                                                          |                                               |
|                    |                     | +              | <i>Ruminococcus</i>     |                                                                                                                                                              |                                                                                          |                                               |
|                    |                     | +              | <i>Roseburia</i>        |                                                                                                                                                              |                                                                                          |                                               |
|                    |                     | +              | <i>Faecalibacterium</i> |                                                                                                                                                              |                                                                                          |                                               |

|                          |                                |                      |                                 |                                                                                                                                     |                                                                                                   |
|--------------------------|--------------------------------|----------------------|---------------------------------|-------------------------------------------------------------------------------------------------------------------------------------|---------------------------------------------------------------------------------------------------|
|                          | Chicken meat                   | +                    | <i>Prevotella</i>               | Increase the risk of skatole- and indole-induced diseases                                                                           | (Shi et al. 2021)                                                                                 |
|                          |                                | +                    | <i>Faecalibacterium</i>         |                                                                                                                                     |                                                                                                   |
|                          |                                | +                    | <i>Megamonas</i>                |                                                                                                                                     |                                                                                                   |
|                          |                                | +                    | <i>Dialister</i>                |                                                                                                                                     |                                                                                                   |
|                          | Cooked meat                    | +                    | <i>Coprobacter</i>              |                                                                                                                                     |                                                                                                   |
| Eggs                     | Eggs                           | +                    | <i>Bacteroides</i>              | CRC individuals                                                                                                                     | (Shen et al. 2021)                                                                                |
|                          |                                | +                    | <i>Parabacteroides</i>          | Heathy                                                                                                                              |                                                                                                   |
|                          |                                | +                    | Porphyromonadaceae              | Improve child growth                                                                                                                | (Suta et al. 2023)                                                                                |
|                          |                                | -                    | Prevotellaceae                  |                                                                                                                                     |                                                                                                   |
|                          |                                | +                    | <i>Bifidobacterium</i>          | NM                                                                                                                                  | (Suta et al. 2023)                                                                                |
|                          |                                | -                    | <i>Prevotella</i>               | SCFA producer                                                                                                                       | (Suta et al. 2023)                                                                                |
|                          |                                | +                    | <i>Lachnospira</i>              | Invasive cervical cancer                                                                                                            | (Suta et al. 2023)                                                                                |
|                          |                                | -                    | <i>Varibaculum</i>              |                                                                                                                                     |                                                                                                   |
| Seafood                  | Cod                            | -                    | Bacteroidota                    | Postprandial glucose regulation                                                                                                     | (Bratlie et al. 2021)                                                                             |
|                          |                                | +                    | Firmicutes                      |                                                                                                                                     |                                                                                                   |
|                          | Salmon                         | -                    | Bacteroidota                    | Data not available                                                                                                                  | (Lopez-Santamarina et al. 2022)                                                                   |
|                          |                                | +                    | Firmicutes                      |                                                                                                                                     |                                                                                                   |
|                          | Crustacean (Talitrus saltator) | +                    | <i>Bifidobacterium</i>          | Beneficial effects on cardiovascular risk                                                                                           | (Balfegó et al. 2016)                                                                             |
|                          |                                | +                    | <i>Lactobacillus</i>            |                                                                                                                                     |                                                                                                   |
|                          |                                | -                    | Firmicutes                      |                                                                                                                                     |                                                                                                   |
|                          |                                | -                    | Bacteroidota                    |                                                                                                                                     |                                                                                                   |
|                          | Sardines                       | -                    | Firmicutes                      | Higher potency against High Fat Diet-induced Nonalcoholic fatty liver disease (NAFLD) and gut dysbiosis.                            | (Tian et al. 2016)                                                                                |
|                          |                                | -                    | Bacteroidota                    |                                                                                                                                     |                                                                                                   |
|                          |                                | +                    | <i>Escherichia coli</i>         |                                                                                                                                     |                                                                                                   |
|                          |                                | +                    | <i>Bacteroides</i>              |                                                                                                                                     |                                                                                                   |
|                          | Fish oil                       | +                    | <i>Prevotella</i>               | Enhanced the integrity of the intestinal epithelial cell barrier and ameliorated the metabolic dysfunction linked to obesity (Mice) | (Monk et al. 2019)                                                                                |
|                          |                                | +                    | <i>Escherichia</i>              |                                                                                                                                     |                                                                                                   |
|                          |                                | +                    | <i>Akkermansia</i>              |                                                                                                                                     |                                                                                                   |
|                          | Menhaden fish oil              | -                    | Bacteroidota                    | Reduce clinical colitis and colonic immunopathology                                                                                 | (Balfegó et al. 2016; Whiting, Bland, and Tarlton 2005; Andersen et al. 2011; Watson et al. 2018) |
|                          |                                | -                    | Firmicutes                      |                                                                                                                                     |                                                                                                   |
|                          |                                | -                    | Bacteroidota                    |                                                                                                                                     |                                                                                                   |
|                          |                                | -                    | <i>Coprococcus</i>              |                                                                                                                                     |                                                                                                   |
|                          |                                | +                    | <i>Faecalibacterium</i>         |                                                                                                                                     |                                                                                                   |
|                          |                                | +                    | <i>Bifidobacterium</i>          |                                                                                                                                     |                                                                                                   |
| +                        |                                | <i>Lachnospira</i>   |                                 |                                                                                                                                     |                                                                                                   |
| +                        |                                | <i>Roseburia</i>     |                                 |                                                                                                                                     |                                                                                                   |
| -                        | <i>Lactobacillus</i>           |                      |                                 |                                                                                                                                     |                                                                                                   |
| Squid ink polysaccharide | -                              | <i>Ruminococcus</i>  | Protect against chemotherapy    | (Lu et al. 2016)                                                                                                                    |                                                                                                   |
|                          | -                              | <i>Bilophila</i>     | Postprandial glucose regulation | (Bratlie et al. 2021)                                                                                                               |                                                                                                   |
|                          | -                              | <i>Oscillospira</i>  |                                 |                                                                                                                                     |                                                                                                   |
|                          | -                              | <i>Dorea</i>         |                                 |                                                                                                                                     |                                                                                                   |
|                          | -                              | <i>Mucispirillum</i> |                                 |                                                                                                                                     |                                                                                                   |
| Dairy                    | Fermented milk product         | +                    | <i>Bifidobacterium animalis</i> | Production of butyrate and others short chain fatty acids                                                                           | (Veiga et al. 2014)                                                                               |

|         |   |                         |                                                                                                                                                                                          |                                                                                                                                                                                                                                                                           |                              |
|---------|---|-------------------------|------------------------------------------------------------------------------------------------------------------------------------------------------------------------------------------|---------------------------------------------------------------------------------------------------------------------------------------------------------------------------------------------------------------------------------------------------------------------------|------------------------------|
|         |   | +                       | <i>Streptococcus thermophilus</i>                                                                                                                                                        | (SCFA) Decreased the levels of the opportunistic pathogen, <i>Bilophila wadsworthia</i> .<br>Improvement of Irritable Bowel Syndrome (IBS)                                                                                                                                |                              |
|         |   | +                       | <i>Lactobacillus delbrueckii</i>                                                                                                                                                         |                                                                                                                                                                                                                                                                           |                              |
|         |   | +                       | <i>Lactococcus lactis</i>                                                                                                                                                                |                                                                                                                                                                                                                                                                           |                              |
|         |   | -                       | <i>Bilophila wadsworthia</i>                                                                                                                                                             |                                                                                                                                                                                                                                                                           |                              |
|         |   | -                       | <i>Parabacteroides distasonis</i>                                                                                                                                                        |                                                                                                                                                                                                                                                                           |                              |
| Milk    |   | +                       | <i>Flavonifractor</i>                                                                                                                                                                    | HD modifies the abundance of specific butyrate-producing bacteria in Firmicutes and Verrucomicrobia in hyperinsulinemic individuals. the butyrate producing bacteria in Firmicutes phylum correlate negatively with insulin resistance. No effect on glycemic parameters, | (Khorraminezhad et al. 2021) |
|         |   | +                       | <i>Faecalibacterium</i>                                                                                                                                                                  |                                                                                                                                                                                                                                                                           |                              |
|         |   | +                       | <i>Anaerotruncus</i>                                                                                                                                                                     |                                                                                                                                                                                                                                                                           |                              |
|         |   | +                       | Actinobacteria                                                                                                                                                                           |                                                                                                                                                                                                                                                                           |                              |
|         |   | +                       | Bifidobacteria                                                                                                                                                                           |                                                                                                                                                                                                                                                                           |                              |
|         |   | +                       | Lachnospiraceae                                                                                                                                                                          |                                                                                                                                                                                                                                                                           |                              |
|         |   | +                       | <i>Roseburia</i>                                                                                                                                                                         |                                                                                                                                                                                                                                                                           |                              |
|         |   | +                       | Proteobacteria                                                                                                                                                                           |                                                                                                                                                                                                                                                                           |                              |
|         |   | -                       | <i>Escherichia coli</i>                                                                                                                                                                  |                                                                                                                                                                                                                                                                           |                              |
|         |   | -                       | Enterobacteriaceae                                                                                                                                                                       |                                                                                                                                                                                                                                                                           |                              |
|         |   | -                       | Lentisphaerae                                                                                                                                                                            |                                                                                                                                                                                                                                                                           |                              |
|         |   | -                       | Verrucomicrobia                                                                                                                                                                          |                                                                                                                                                                                                                                                                           |                              |
|         |   | +                       | <i>Streptococcus</i>                                                                                                                                                                     | The dairy-related gut microbial features are favorably associated with cardiometabolic risk factors, such as blood triglycerides and HDL cholesterol.                                                                                                                     | (Shuai et al. 2021)          |
|         |   | +                       | <i>Haemophilus</i>                                                                                                                                                                       |                                                                                                                                                                                                                                                                           |                              |
|         |   | +                       | <i>Bifidobacterium</i>                                                                                                                                                                   |                                                                                                                                                                                                                                                                           |                              |
|         |   | +                       | <i>Clostridium</i>                                                                                                                                                                       |                                                                                                                                                                                                                                                                           |                              |
|         |   | +                       | <i>Flavonifractor</i>                                                                                                                                                                    | HD modifies the abundance of specific butyrate-producing bacteria in Firmicutes and Verrucomicrobia in hyperinsulinemic individuals. the butyrate producing bacteria in Firmicutes phylum correlate negatively with insulin resistance. No effect on glycemic parameters, | (Khorraminezhad et al. 2021) |
|         |   | +                       | <i>Faecalibacterium</i>                                                                                                                                                                  |                                                                                                                                                                                                                                                                           |                              |
|         |   | +                       | <i>Anaerotruncus</i>                                                                                                                                                                     |                                                                                                                                                                                                                                                                           |                              |
|         |   | +                       | Actinobacteria                                                                                                                                                                           |                                                                                                                                                                                                                                                                           |                              |
|         |   | +                       | Bifidobacteria                                                                                                                                                                           |                                                                                                                                                                                                                                                                           |                              |
|         |   | +                       | Lachnospiraceae                                                                                                                                                                          |                                                                                                                                                                                                                                                                           |                              |
|         |   | +                       | <i>Roseburia</i>                                                                                                                                                                         |                                                                                                                                                                                                                                                                           |                              |
|         |   | +                       | Proteobacteria                                                                                                                                                                           |                                                                                                                                                                                                                                                                           |                              |
|         | - | <i>Escherichia coli</i> |                                                                                                                                                                                          |                                                                                                                                                                                                                                                                           |                              |
|         | - | Enterobacteriaceae      |                                                                                                                                                                                          |                                                                                                                                                                                                                                                                           |                              |
|         | - | Lentisphaerae           |                                                                                                                                                                                          |                                                                                                                                                                                                                                                                           |                              |
|         | - | Verrucomicrobia         |                                                                                                                                                                                          |                                                                                                                                                                                                                                                                           |                              |
|         | + | Ruminococcaceae         | Dairy- related gut microbiota may influence the host circulating metabolomics profile, contributing to the beneficial association of dairy intake with the cardiometabolic risk factors. | (Shuai et al. 2021)                                                                                                                                                                                                                                                       |                              |
|         | + | <i>Lachnobacterium</i>  |                                                                                                                                                                                          |                                                                                                                                                                                                                                                                           |                              |
|         | + | <i>Megasphaera</i>      |                                                                                                                                                                                          |                                                                                                                                                                                                                                                                           |                              |
|         | + | Veillonellaceae         |                                                                                                                                                                                          |                                                                                                                                                                                                                                                                           |                              |
| Cheese, |   | +                       | <i>Flavonifractor</i>                                                                                                                                                                    | HD modifies the abundance of specific butyrate-producing bacteria in Firmicutes and Verrucomicrobia in hyperinsulinemic individuals. the butyrate producing bacteria in Firmicutes phylum correlate negatively with insulin                                               | (Khorraminezhad et al. 2021) |
|         |   | +                       | <i>Faecalibacterium</i>                                                                                                                                                                  |                                                                                                                                                                                                                                                                           |                              |
|         |   | +                       | <i>Anaerotruncus</i>                                                                                                                                                                     |                                                                                                                                                                                                                                                                           |                              |
|         |   | +                       | Actinobacteria                                                                                                                                                                           |                                                                                                                                                                                                                                                                           |                              |
|         |   | +                       | Bifidobacteria                                                                                                                                                                           |                                                                                                                                                                                                                                                                           |                              |
|         |   | +                       | Lachnospiraceae                                                                                                                                                                          |                                                                                                                                                                                                                                                                           |                              |
|         |   | +                       | <i>Roseburia</i>                                                                                                                                                                         |                                                                                                                                                                                                                                                                           |                              |
|         |   | +                       | Proteobacteria                                                                                                                                                                           |                                                                                                                                                                                                                                                                           |                              |

|             |  |   |                               |                                                                                                                    |                      |
|-------------|--|---|-------------------------------|--------------------------------------------------------------------------------------------------------------------|----------------------|
|             |  | - | <i>Escherichia coli</i>       | resistance. No effect on glycemic parameters,                                                                      |                      |
|             |  | - | Enterobacteriaceae            |                                                                                                                    |                      |
|             |  | - | Lentisphaerae                 |                                                                                                                    |                      |
|             |  | - | Verrucomicrobia               |                                                                                                                    |                      |
| Kefir       |  | + | <i>Flavonifractor</i>         |                                                                                                                    |                      |
|             |  | + | <i>Faecalibacterium</i>       |                                                                                                                    |                      |
|             |  | + | <i>Anaerotruncus</i>          |                                                                                                                    |                      |
|             |  | + | Actinobacteria                |                                                                                                                    |                      |
|             |  | + | Bifidobacteria                |                                                                                                                    |                      |
|             |  | + | Lachnospiraceae               |                                                                                                                    |                      |
|             |  | + | <i>Roseburia</i>              |                                                                                                                    |                      |
|             |  | + | Proteobacteria                |                                                                                                                    |                      |
|             |  | - | <i>Escherichia coli</i>       |                                                                                                                    |                      |
|             |  | - | Enterobacteriaceae            |                                                                                                                    |                      |
|             |  | - | Lentisphaerae                 |                                                                                                                    |                      |
|             |  | - | Verrucomicrobia               |                                                                                                                    |                      |
| Cream       |  | + | <i>Flavonifractor</i>         |                                                                                                                    |                      |
|             |  | + | <i>Faecalibacterium</i>       |                                                                                                                    |                      |
|             |  | + | <i>Anaerotruncus</i>          |                                                                                                                    |                      |
|             |  | + | Actinobacteria                |                                                                                                                    |                      |
|             |  | + | Bifidobacteria                |                                                                                                                    |                      |
|             |  | + | Lachnospiraceae               |                                                                                                                    |                      |
|             |  | + | <i>Roseburia</i>              |                                                                                                                    |                      |
|             |  | + | Proteobacteria                |                                                                                                                    |                      |
|             |  | - | <i>Escherichia coli</i>       |                                                                                                                    |                      |
|             |  | - | Enterobacteriaceae            |                                                                                                                    |                      |
|             |  | - | Lentisphaerae                 |                                                                                                                    |                      |
|             |  | - | Verrucomicrobia               |                                                                                                                    |                      |
| Ice cream   |  | + | <i>Flavonifractor</i>         |                                                                                                                    |                      |
|             |  | + | <i>Faecalibacterium</i>       |                                                                                                                    |                      |
|             |  | + | <i>Anaerotruncus</i>          |                                                                                                                    |                      |
|             |  | + | Actinobacteria                |                                                                                                                    |                      |
|             |  | + | Bifidobacteria                |                                                                                                                    |                      |
|             |  | + | Lachnospiraceae               |                                                                                                                    |                      |
|             |  | + | <i>Roseburia</i>              |                                                                                                                    |                      |
|             |  | + | Proteobacteria                |                                                                                                                    |                      |
|             |  | - | <i>Escherichia coli</i>       |                                                                                                                    |                      |
|             |  | - | Enterobacteriaceae            |                                                                                                                    |                      |
|             |  | - | Lentisphaerae                 |                                                                                                                    |                      |
|             |  | - | Verrucomicrobia               |                                                                                                                    |                      |
| Feta cheese |  | + | <i>Enterococcus faecium</i>   | Low pH, presence of organic acids, and the bacteria profiles it-self, Improving the intestinal microbial ecosystem | (Vassos et al. 2009) |
|             |  | + | <i>Enterococcus faecalis</i>  |                                                                                                                    |                      |
|             |  | - | <i>Salmonella Typhi</i>       |                                                                                                                    |                      |
|             |  | - | <i>Salmonella Typhimurium</i> |                                                                                                                    |                      |
|             |  | - | <i>Salmonella arizonae</i>    |                                                                                                                    |                      |
|             |  | - | <i>Salmonella enteritidis</i> |                                                                                                                    |                      |
| Goat cheese |  | + | <i>Enterococcus faecium</i>   |                                                                                                                    |                      |
|             |  | + | <i>Enterococcus faecalis</i>  |                                                                                                                    |                      |

|       |                                |   |                                    |                                                                                                                                                                                                                                                                                                                                                                                                                                              |                        |
|-------|--------------------------------|---|------------------------------------|----------------------------------------------------------------------------------------------------------------------------------------------------------------------------------------------------------------------------------------------------------------------------------------------------------------------------------------------------------------------------------------------------------------------------------------------|------------------------|
|       |                                | - | <i>Salmonella Typhi</i>            |                                                                                                                                                                                                                                                                                                                                                                                                                                              |                        |
|       |                                | - | <i>Salmonella Typhimurium</i>      |                                                                                                                                                                                                                                                                                                                                                                                                                                              |                        |
|       |                                | - | <i>Salmonella arizonae</i>         |                                                                                                                                                                                                                                                                                                                                                                                                                                              |                        |
|       |                                | - | <i>Salmonella enteritidis</i>      |                                                                                                                                                                                                                                                                                                                                                                                                                                              |                        |
|       | Natural yogurt                 | + | <i>Akkermansia</i>                 | Direct association with LDL/HDL ratio values, serum CRP was significantly lower.                                                                                                                                                                                                                                                                                                                                                             | (González et al. 2019) |
|       | Sugar yogurt                   | - | <i>Bacteroides</i>                 |                                                                                                                                                                                                                                                                                                                                                                                                                                              |                        |
|       | Dairy diet                     | + | <i>Bifidobacterium</i>             | Higher dairy consumption is prospectively associated with a higher gut microbiota a-diversity, The dairy-related gut microbial features are favorably associated with cardiometabolic risk factors, such as blood triglycerides and HDL cholesterol. Dairy-related gut microbiota may influence the host circulating metabolomics profile, contributing to the beneficial association of dairy intake with the cardiometabolic risk factors. | (Shuai et al. 2021)    |
|       |                                | + | <i>Streptococcus</i>               |                                                                                                                                                                                                                                                                                                                                                                                                                                              |                        |
|       |                                | + | <i>Clostridium</i>                 |                                                                                                                                                                                                                                                                                                                                                                                                                                              |                        |
| Honey | Honey                          | + | <i>Lactobacillus</i>               | Increase weight and Head circumference increased                                                                                                                                                                                                                                                                                                                                                                                             | (Aly et al. 2017)      |
|       |                                | + | <i>Bifidobacterium</i>             |                                                                                                                                                                                                                                                                                                                                                                                                                                              |                        |
|       |                                | - | <i>Parvimonas</i>                  | Data not available                                                                                                                                                                                                                                                                                                                                                                                                                           | Li et al., (2020)      |
|       |                                | - | <i>Enterococcus caccae</i>         | Ameliorate cardiovascular diseases                                                                                                                                                                                                                                                                                                                                                                                                           | Firmman et al., (2016) |
|       |                                | - | <i>Bifidobacterium catenulatum</i> |                                                                                                                                                                                                                                                                                                                                                                                                                                              |                        |
|       |                                | 0 | <i>Ruminococcus gnavreaii</i>      |                                                                                                                                                                                                                                                                                                                                                                                                                                              |                        |
|       |                                | - | <i>Veillonella</i>                 | Data not available                                                                                                                                                                                                                                                                                                                                                                                                                           | Sachdev et al., (2021) |
|       |                                | - | <i>Clostridium</i>                 |                                                                                                                                                                                                                                                                                                                                                                                                                                              |                        |
|       |                                | - | <i>Staphylococcus</i>              |                                                                                                                                                                                                                                                                                                                                                                                                                                              |                        |
|       |                                | - | <i>Proteus</i>                     |                                                                                                                                                                                                                                                                                                                                                                                                                                              |                        |
|       |                                | - | <i>Salmonella</i>                  | Promote healthy bowel function and reduce infection and inflammation                                                                                                                                                                                                                                                                                                                                                                         | Schell et al., (2022)  |
|       |                                | - | <i>Escherichia coli</i>            |                                                                                                                                                                                                                                                                                                                                                                                                                                              |                        |
|       |                                | - | <i>Clostridiodes</i>               |                                                                                                                                                                                                                                                                                                                                                                                                                                              |                        |
|       |                                | - | <i>Enterobacter</i>                | Increase weight and Head circumference increased                                                                                                                                                                                                                                                                                                                                                                                             | (Aly et al. 2017)      |
|       |                                | + | <i>Megamonas</i>                   | Data not available                                                                                                                                                                                                                                                                                                                                                                                                                           | (Jiang et al. 2020)    |
|       |                                | + | <i>Streptococcus</i>               |                                                                                                                                                                                                                                                                                                                                                                                                                                              |                        |
| -     | <i>Prevotella</i>              |   |                                    |                                                                                                                                                                                                                                                                                                                                                                                                                                              |                        |
| -     | <i>Faecalibacterium</i>        |   |                                    |                                                                                                                                                                                                                                                                                                                                                                                                                                              |                        |
| -     | Lachnospiraceae incertae sedis |   |                                    |                                                                                                                                                                                                                                                                                                                                                                                                                                              |                        |

(+): Beneficial, (-) potentially harmful, (0) Neutral effect.

### Abbreviations:

**CVD:** Cardiovascular Disease

**CRC:** Colorectal Cancer

**IGI:** Insulinogenic Index  
**MIRI:** Myocardial Ischemia-Reperfusion Injury  
**LPS:** Lipopolysaccharides  
**FGF21:** Fibroblast Growth Factor 21  
**TNF- $\alpha$ :** Tumor Necrosis Factor Alpha  
**IL-1 $\beta$ :** Interleukin 1 Beta  
**IL-10:** Interleukin 10  
**NM:** Not Mentioned  
**SCFA:** Short Chain Fatty Acids  
**IBS:** Irritable Bowel Syndrome  
**HD:** High Dairy  
**HDL:** High-Density Lipoprotein  
**LDL:** Low-Density Lipoprotein  
**CRP:** C-Reactive Protein

## References:

- Aly, Hany, Reem N. Said, Iman E. Wali, Amany Elwakkad, Yssra Soliman, Alaa R. Awad, Mahmoud A. Shawky, Mohamed S. Abu Alam, and Mohamed A. Mohamed. 2017. "Medically Graded Honey Supplementation Formula to Preterm Infants as a Prebiotic." *Journal of Pediatric Gastroenterology and Nutrition* 64 (6): 966–70.
- Andersen, Anders Daniel, Lars Mølbak, Kim Fleischer Michaelsen, and Lotte Lauritzen. 2011. "Molecular Fingerprints of the Human Fecal Microbiota from 9 to 18 Months Old and the Effect of Fish Oil Supplementation." *Journal of Pediatric Gastroenterology and Nutrition* 53 (3): 303–9.
- Balfegó, Mariona, Silvia Canivell, Felicia A. Hanzu, Aleix Sala-Vila, Margarita Martínez-Medina, Serafín Murillo, Teresa Mur, et al. 2016. "Effects of Sardine-Enriched Diet on Metabolic Control, Inflammation and Gut Microbiota in Drug-Naïve Patients with Type 2 Diabetes: A Pilot Randomized Trial." *Lipids in Health and Disease* 15 (1). <https://doi.org/10.1186/s12944-016-0245-0>.
- Bratlie, Marianne, Ingrid V. Hagen, Anita Helland, Friedemann Erchinger, Øivind Midttun, Per Magne Ueland, Grethe Rosenlund, et al. 2021. "Effects of High Intake of Cod or Salmon on Gut Microbiota Profile, Faecal Output and Serum Concentrations of Lipids and Bile Acids in Overweight Adults: A Randomised Clinical Trial." *European Journal of Nutrition* 60 (4): 2231–48.
- Gao, Jian, Xiaoyu Guo, Wei Wei, Ran Li, Ke Hu, Xin Liu, Wenbo Jiang, et al. 2021. "The Association of Fried Meat Consumption With the Gut Microbiota and Fecal Metabolites and Its Impact on Glucose Homeostasis, Intestinal Endotoxin Levels, and Systemic Inflammation: A Randomized Controlled-Feeding Trial." *Diabetes Care* 44 (9): 1970–79.
- González, S., T. Fernández-Navarro, S. Arboleya, C. G. de Los Reyes-Gavilán, N. Salazar, and M. Gueimonde. 2019. "Fermented Dairy Foods: Impact on Intestinal Microbiota and Health-Linked Biomarkers." *Frontiers in Microbiology* 10 (May): 1046.

- Hess, Julie, Qi Wang, Trevor Gould, and Joanne Slavin. 2018. "Impact of Agaricus Bisporus Mushroom Consumption on Gut Health Markers in Healthy Adults." *Nutrients* 10 (10). <https://doi.org/10.3390/nu10101402>.
- Jiang, Li, Minhao Xie, Guijie Chen, Jiangtao Qiao, Hongcheng Zhang, and Xiaoxiong Zeng. 2020. "Phenolics and Carbohydrates in Buckwheat Honey Regulate the Human Intestinal Microbiota." *Evidence-Based Complementary and Alternative Medicine: ECAM* 2020 (1). <https://doi.org/10.1155/2020/6432942>.
- Karlsson, Fredrik H., Valentina Tremaroli, Intawat Nookaew, Göran Bergström, Carl Johan Behre, Björn Fagerberg, Jens Nielsen, and Fredrik Bäckhed. 2013. "Gut Metagenome in European Women with Normal, Impaired and Diabetic Glucose Control." *Nature* 498 (7452): 99–103.
- Khorraminezhad, Leila, Mickael Leclercq, Sarah O'Connor, Pierre Julien, S. John Weisnagel, Claudia Gagnon, Arnaud Droit, and Iwona Rudkowska. 2021. "Dairy Product Intake Modifies Gut Microbiota Composition among Hyperinsulinemic Individuals." *European Journal of Nutrition* 60 (1): 159–67.
- Koeth, Robert A., Zeneng Wang, Bruce S. Levison, Jennifer A. Buffa, Elin Org, Brendan T. Sheehy, Earl B. Britt, et al. 2013. "Intestinal Microbiota Metabolism of L-Carnitine, a Nutrient in Red Meat, Promotes Atherosclerosis." *Nature Medicine* 19 (5): 576–85.
- Lang, Jennifer M., Calvin Pan, Rita M. Cantor, W. H. Wilson Tang, Jose Carlos Garcia-Garcia, Ira Kurtz, Stanley L. Hazen, Nathalie Bergeron, Ronald M. Krauss, and Aldons J. Lysis. 2018. "Impact of Individual Traits, Saturated Fat, and Protein Source on the Gut Microbiome." *MBio* 9 (6). <https://doi.org/10.1128/mBio.01604-18>.
- Larsen, Nadja, Finn K. Vogensen, Frans W. J. van den Berg, Dennis Sandris Nielsen, Anne Sofie Andreasen, Bente K. Pedersen, Waleed Abu Al-Soud, Søren J. Sørensen, Lars H. Hansen, and Mogens Jakobsen. 2010. "Gut Microbiota in Human Adults with Type 2 Diabetes Differs from Non-Diabetic Adults." *PLoS One* 5 (2): e9085.
- Lee, Seung Yun, Da Young Lee, Ji Hyeop Kang, Jae Hyeon Kim, Jae Won Jeong, Hyun Woo Kim, Dong Hoon Oh, Seung Hyeon Yoon, and Sun Jin Hur. 2022. "Relationship between Gut Microbiota and Colorectal Cancer: Probiotics as a Potential Strategy for Prevention." *Food Research International* 156 (June): 111327.
- Lin Q., Lun J., Zhang J., He X., Gong Z., Gao X., and Cao H. 2021. "[Gut microbiome composition in pre-adolescent children with different meat consumption patterns]." *Nan fang yi ke da xue xue bao = Journal of Southern Medical University* 41 (12): 1801–1088.
- Lopez-Santamarina, Aroa, Alejandra Cardelle-Cobas, Alexandre Lamas, Alicia Mondragon-Portocarrero, Alberto Cepeda, and Jose Manuel Miranda. 2022. "Nutritional Composition, Heavy Metal Content and in Vitro Effect on the Human Gut Microbiota of Talitrus Saltator, an Underutilized Crustacean from the Atlantic Coast." *Frontiers in Nutrition* 9 (October). <https://doi.org/10.3389/fnut.2022.943133>.
- Lu, Shangyun, Tao Zuo, Na Zhang, Hongjie Shi, Fang Liu, Juan Wu, Yuming Wang, Changhu Xue, and Qing-Juan Tang. 2016. "High Throughput Sequencing Analysis Reveals Amelioration of Intestinal Dysbiosis by Squid Ink Polysaccharide." *Journal of Functional Foods* 20 (January): 506–15.
- Monk, Jennifer M., Danyelle M. Liddle, Amber L. Hutchinson, Wenqing Wu, Dion Lepp, David W. L. Ma, Lindsay E. Robinson, and Krista A. Power. 2019. "Fish Oil Supplementation to a High-Fat Diet Improves Both Intestinal Health and the Systemic Obese Phenotype." *The Journal of Nutritional Biochemistry* 72 (108216): 108216.
- Moreno-Pérez, Diego, Carlo Bressa, María Bailén, Safa Hamed-Bousdar, Fernando Naclerio, Manuel Carmona, Margarita Pérez, et al. 2018. "Effect of a Protein Supplement on the Gut Microbiota of Endurance Athletes: A Randomized, Controlled, Double-Blind Pilot Study." *Nutrients* 10 (3). <https://doi.org/10.3390/nu10030337>.

- Shen, Weitao, Jiayu Sun, Zhiyang Li, Fen Yao, Kaihuang Lin, and Xiaoyang Jiao. 2021. "Food Intake and Its Effect on the Species and Abundance of Intestinal Flora in Colorectal Cancer and Healthy Individuals." *The Korean Journal of Internal Medicine* 36 (3): 568–83.
- Shi, Jie, Di Zhao, Fan Zhao, Chong Wang, Galia Zamaratskaia, and Chunbao Li. 2021. "Chicken-Eaters and Pork-Eaters Have Different Gut Microbiota and Tryptophan Metabolites." *Scientific Reports* 11 (1): 11934.
- Shuai, Menglei, Luo-Shi-Yuan Zuo, Zelei Miao, Wanglong Gou, Fengzhe Xu, Zengliang Jiang, Chu-Wen Ling, et al. 2021. "Multi-Omics Analyses Reveal Relationships among Dairy Consumption, Gut Microbiota and Cardiometabolic Health." *EBioMedicine* 66 (April): 103284.
- Suta, Sophida, Apinya Surawit, Pichanun Mongkolsucharitkul, Bonggochpass Pinsawas, Thamonwan Manosan, Suphawan Ophakas, Tanyaporn Pongkunakorn, et al. 2023. "Prolonged Egg Supplement Advances Growing Child's Growth and Gut Microbiota." *Nutrients* 15 (5). <https://doi.org/10.3390/nu15051143>.
- Tian, Yu, Hualin Wang, Fahu Yuan, Na Li, Qiang Huang, Lei He, Limei Wang, and Zhiguo Liu. 2016. "Perilla Oil Has Similar Protective Effects of Fish Oil on High-Fat Diet-Induced Nonalcoholic Fatty Liver Disease and Gut Dysbiosis." *BioMed Research International* 2016: 1–11.
- Vassos, Dimitris, Eugenia Bezirtzoglou, Chrisa Voidarou, Athanasios Alexopoulos, and Vassiliki Maipa. 2009. "Survey of Probiotic Enterococci from Traditional Dairy Products and Their Impact upon the Infant Intestinal Microbiota." *The Journal of General and Applied Microbiology* 55 (4): 311–15.
- Veiga, Patrick, Nicolas Pons, Anurag Agrawal, Raish Oozeer, Denis Guyonnet, Rémi Brazeilles, Jean-Michel Faurie, et al. 2014. "Changes of the Human Gut Microbiome Induced by a Fermented Milk Product." *Scientific Reports* 4 (September): 6328.
- Wang, Yu, Cassi N. Uffelman, Robert E. Bergia, Caroline M. Clark, Jason B. Reed, Tzu-Wen L. Cross, Stephen R. Lindemann, Minghua Tang, and Wayne W. Campbell. 2023. "Meat Consumption and Gut Microbiota: A Scoping Review of Literature and Systematic Review of Randomized Controlled Trials in Adults." *Advances in Nutrition* 14 (2): 215–37.
- Watson, Henry, Suparna Mitra, Fiona C. Croden, Morag Taylor, Henry M. Wood, Sarah L. Perry, Jade A. Spencer, et al. 2018. "A Randomised Trial of the Effect of Omega-3 Polyunsaturated Fatty Acid Supplements on the Human Intestinal Microbiota." *Gut* 67 (11): 1974–83.
- Whiting, Christine V., Paul W. Bland, and John F. Tarlton. 2005. "Dietary N-3 Polyunsaturated Fatty Acids Reduce Disease and Colonic Proinflammatory Cytokines in a Mouse Model of Colitis." *Inflammatory Bowel Diseases* 11 (4): 340–49.
- Zhang, Yuhan, Hongda Chen, Ming Lu, Jie Cai, Bin Lu, Chenyu Luo, and Min Dai. 2022. "Habitual Diet Pattern Associations with Gut Microbiome Diversity and Composition: Results from a Chinese Adult Cohort." *Nutrients* 14 (13). <https://doi.org/10.3390/nu14132639>.
- Zhao, Di, Kai Shan, Yunting Xie, Guanghong Zhang, Qi An, Xiaobo Yu, Guanghong Zhou, and Chunbao Li. 2022. "Body Weight Index Indicates the Responses of the Fecal Microbiota, Metabolome and Proteome to Beef/Chicken-Based Diet Alterations in Chinese Volunteers." *NPJ Biofilms and Microbiomes* 8 (1): 56.

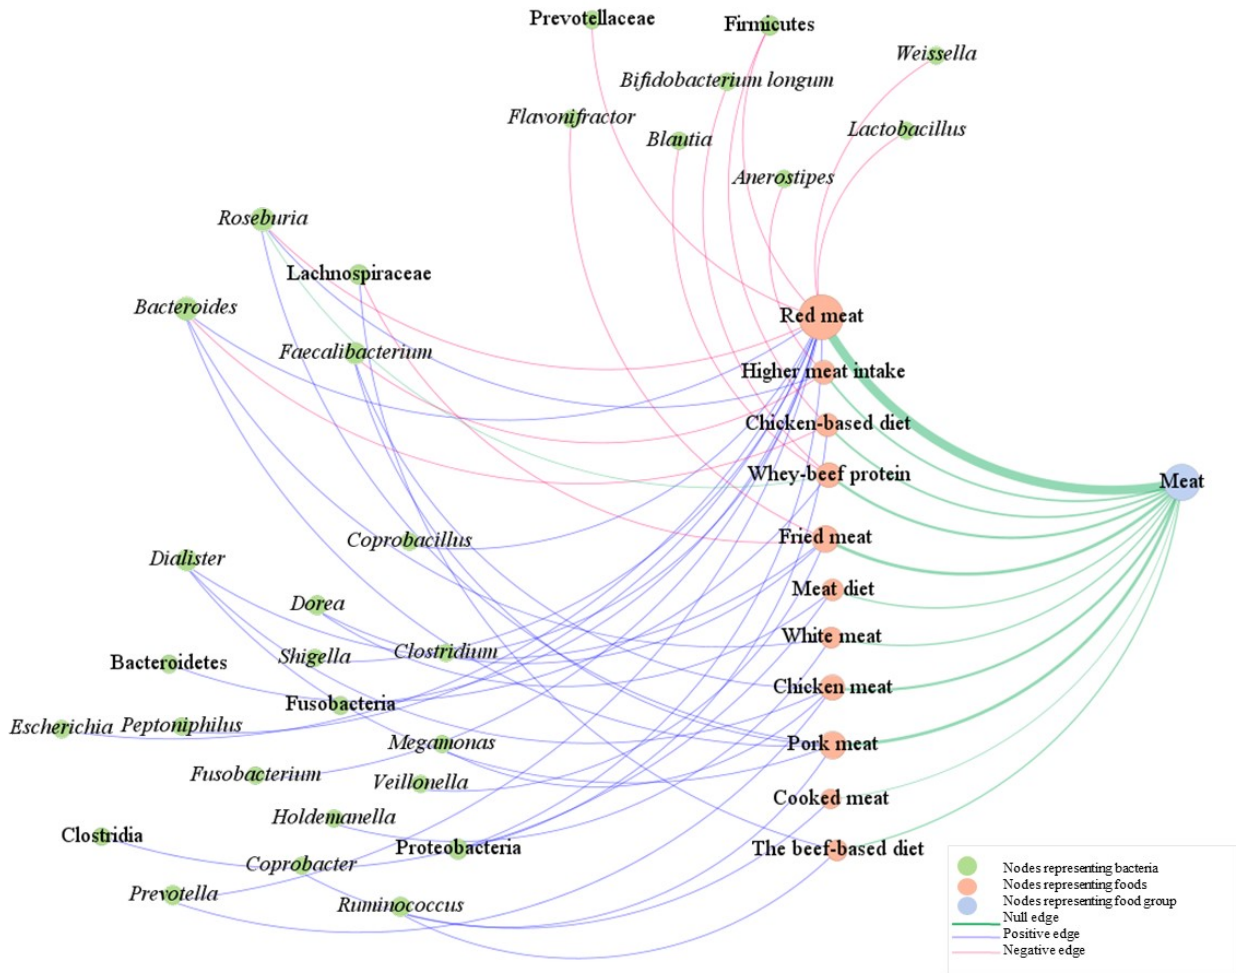

**Fig. S1** : Graphical synthesis of reported associations between meat consumption (bold nodes) and gut bacterial taxa (standard nodes), constructed using Gephi (version 0.10.1). Green edges indicate positive associations (increased abundance), red/orange edges indicate negative associations (decreased abundance), and blue/grey edges indicate neutral effects. Node size reflects the number of reported associations.

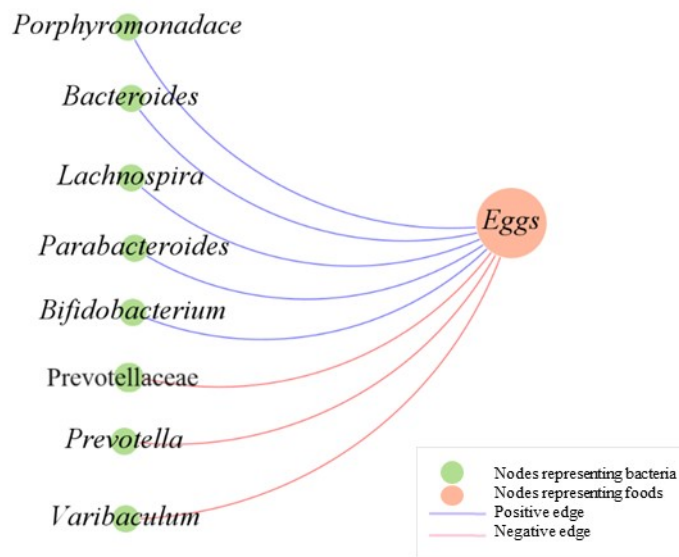

**Fig. S2** : Graphical synthesis of reported associations between Eggs consumption (bold nodes) and gut bacterial taxa (standard nodes), constructed using Gephi (version 0.10.1). Green edges indicate positive associations (increased abundance), red/orange edges indicate negative associations (decreased abundance), and blue/grey edges indicate neutral effects. Node size reflects the number of reported associations.

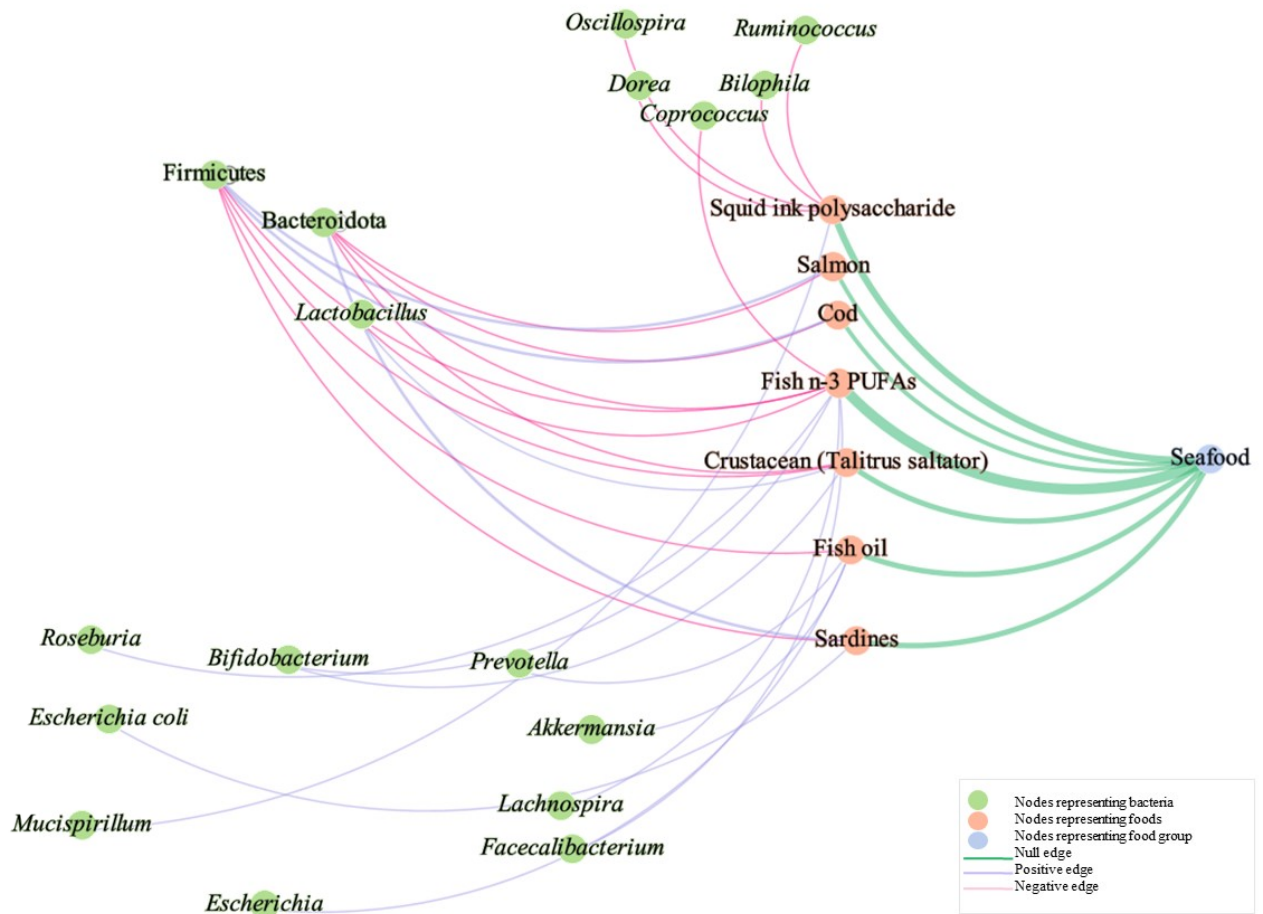

**Fig. S3** : Graphical synthesis of reported associations between seafood consumption (bold nodes) and gut bacterial taxa (standard nodes), constructed using Gephi (version 0.10.1). Green edges indicate positive associations (increased abundance), red/orange edges indicate negative associations (decreased abundance), and blue/grey edges indicate neutral effects. Node size reflects the number of reported associations.

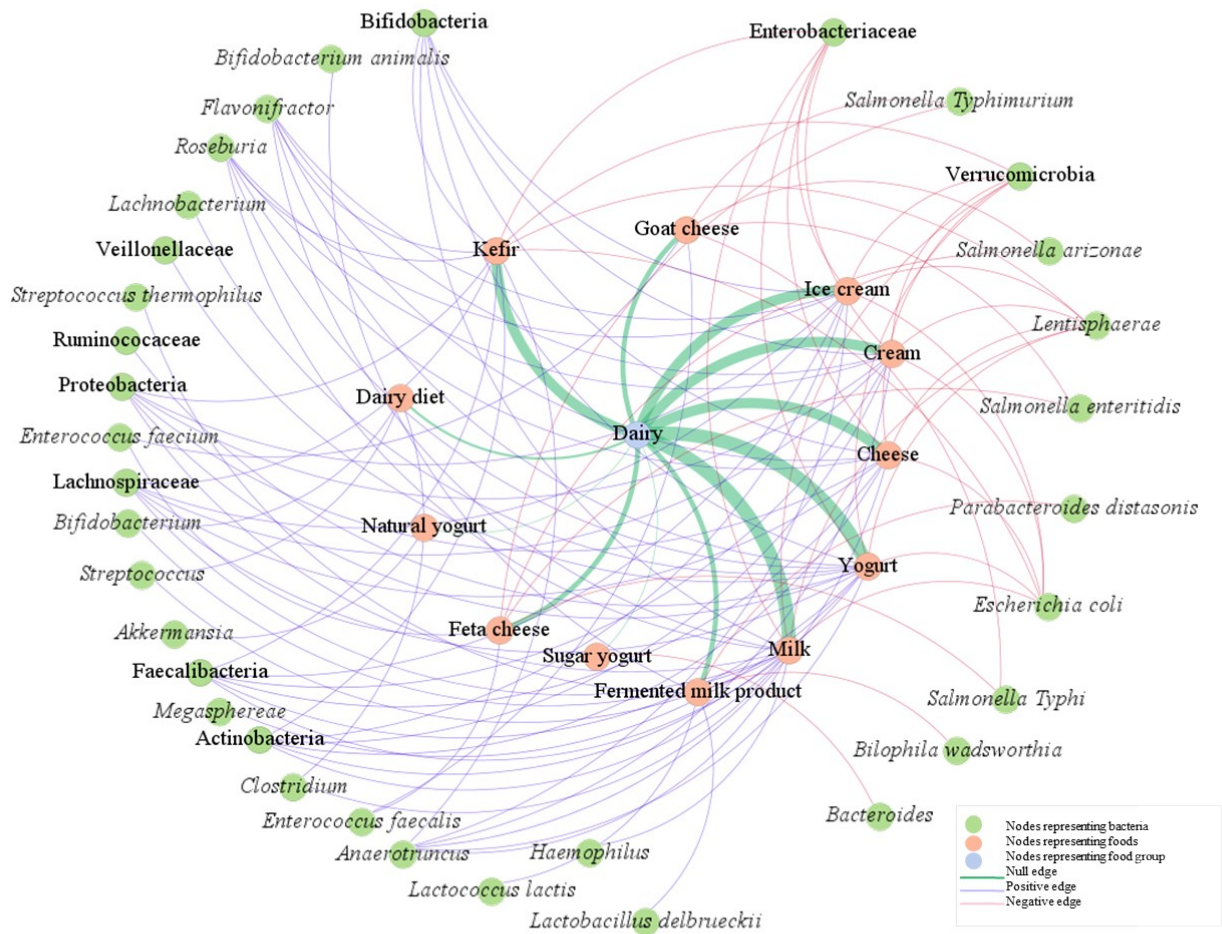

**Fig.S4** : Graphical synthesis of reported associations between dairy consumption (bold nodes) and gut bacterial taxa (standard nodes), constructed using Gephi (version 0.10.1). Green edges indicate positive associations (increased abundance), red/orange edges indicate negative associations (decreased abundance), and blue/grey edges indicate neutral effects. Node size reflects the number of reported associations.
